# Supplementary material for: Risk Factors for Venous Thromboembolism in Severe COVID-19: A Study-Level Meta-Analysis of 21 Studies
Source: MDPI journal article supplement (doi:10.3390/ijerph182412944), 2021-12-08

## SUPPLEMENT

Supplemental Figure S1. Funnel plot of studies reporting D-dimer as prognostic factor for VTE

(Egger's regression test for asymmetry  $p=0.50$ )

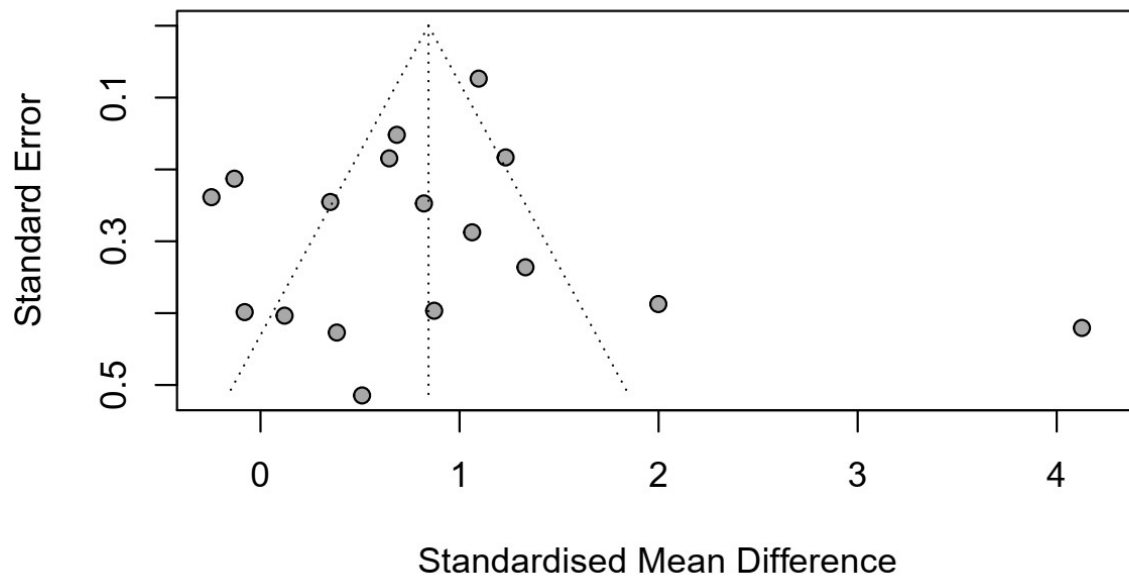

Supplemental Figure S2. Funnel plot of studies reporting C-reactive protein as prognostic factor for VTE (Egger's regression test for asymmetry  $p=0.54$ )

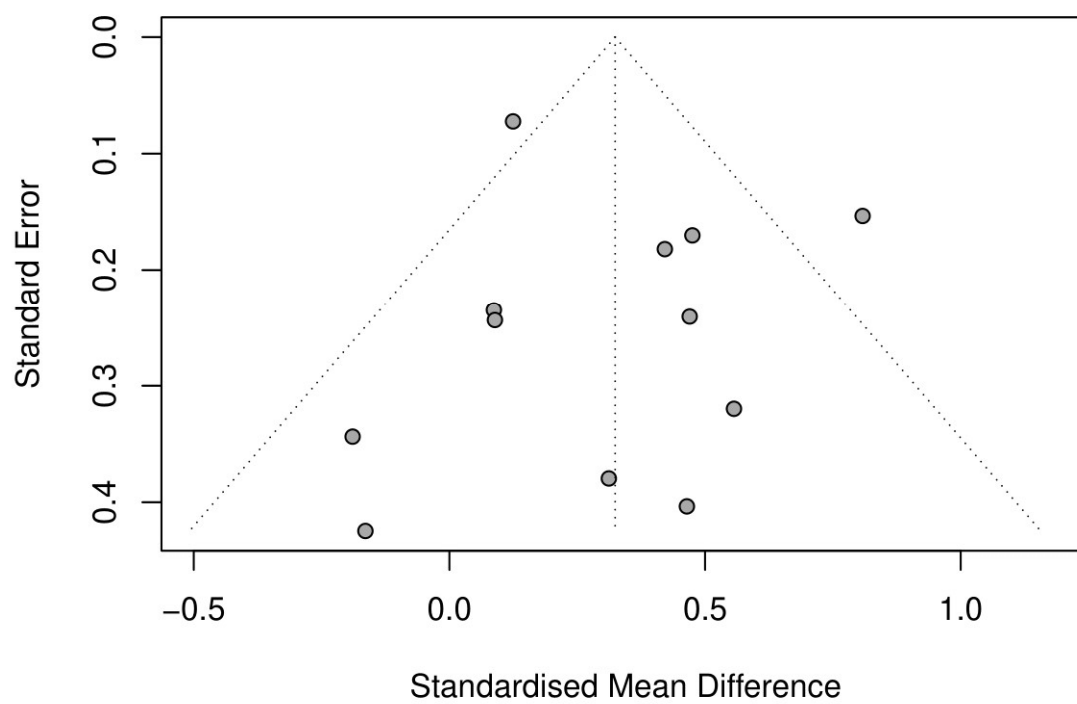

Supplemental Figure S3. Funnel plot of studies reporting platelet level as prognostic factor for VTE (Egger's regression test for asymmetry  $p=0.86$ )

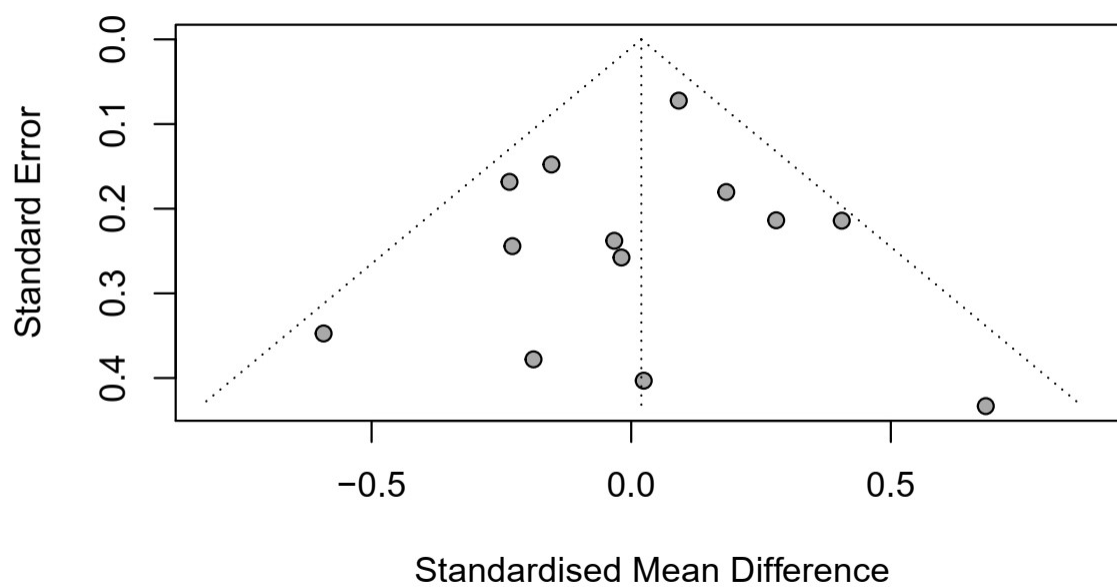

Supplemental Figure S4. Funnel plot of studies reporting age as prognostic factor for VTE  
(Egger's regression test for asymmetry  $p=0.80$ )

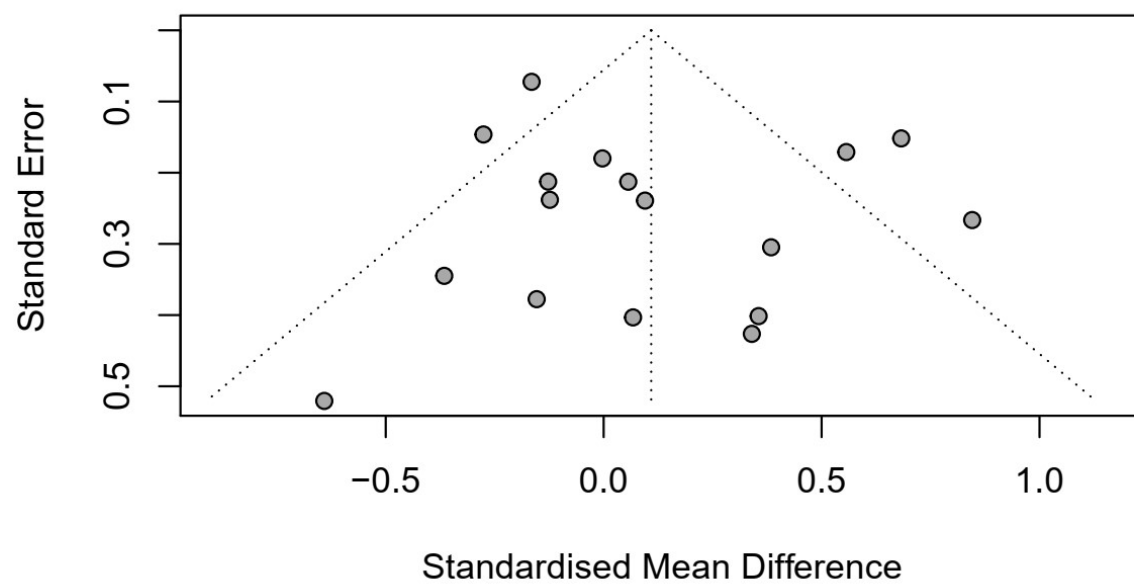

Supplemental Figure S5. Funnel plot of studies reporting body mass index as prognostic factor for VTE (Egger's regression test for asymmetry  $p=0.71$ )

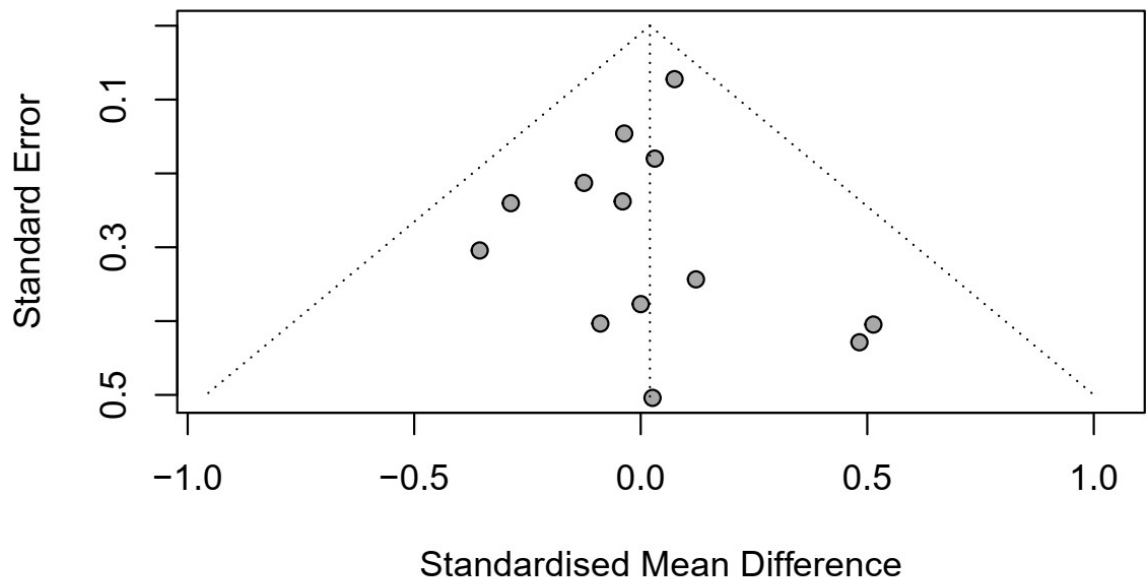

Supplemental Figure S6. Funnel plot of studies reporting fibrinogen level as prognostic factor for VTE (Egger's regression test for asymmetry  $p=0.07$ )

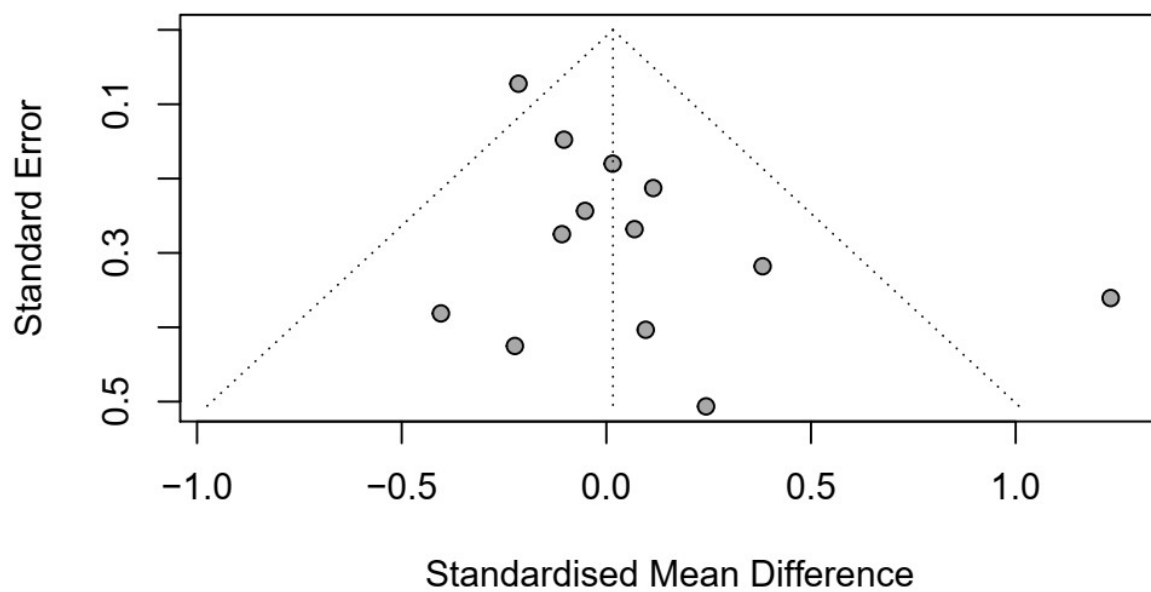

Supplement: s1 [file s1]
